# Supplementary material for: Real-World Effectiveness of Sotrovimab for the Early Treatment of COVID-19: Evidence from the US National COVID Cohort Collaborative (N3C)
Source: Springer Nature journal article supplement (doi:10.1007/s40261-024-01344-4), 2024-02-20
Supplement: MOESM1 [file 26754216]

# **Real-world Effectiveness of Sotrovimab for the Early Treatment of COVID-19: Evidence from the US National COVID Cohort Collaborative (N3C)**

*Journal:* Clinical Drug Investigation

Christopher F. Bell<sup>1</sup>, Priyanka Bobbili<sup>2</sup>, Raj Desai<sup>2</sup>, Daniel C. Gibbons<sup>3</sup>, Myriam Drysdale<sup>3</sup>, Maral DerSarkissian<sup>4</sup>, Vishal Patel<sup>3</sup>, Helen J. Birch<sup>3</sup>, Emily J. Lloyd<sup>3</sup>, Adina Zhang<sup>2</sup>, Mei Sheng Duh<sup>2</sup>; on behalf of the N3C consortium

<sup>1</sup>GSK, Research Triangle Park, NC, USA

<sup>2</sup>Analysis Group, Boston, MA, USA

<sup>3</sup>GSK, Brentford, Middlesex, UK

<sup>4</sup>Analysis Group, Los Angeles, CA, USA

## **Corresponding author:**

Christopher Bell

GSK

410 Blackwell Street

Durham, NC 27701

USA

[christopher.f.bell@gsk.com](mailto:christopher.f.bell@gsk.com)

**Table S1** Emergency Use Authorization criteria

| <b>Criteria<sup>a</sup></b>                                             | <b>Additional information</b>                                                                                                                                                                                                                                                         |
|-------------------------------------------------------------------------|---------------------------------------------------------------------------------------------------------------------------------------------------------------------------------------------------------------------------------------------------------------------------------------|
| Age $\geq$ 65 years                                                     |                                                                                                                                                                                                                                                                                       |
| Obesity                                                                 |                                                                                                                                                                                                                                                                                       |
| Pregnancy                                                               |                                                                                                                                                                                                                                                                                       |
| History of CKD (any stage)                                              |                                                                                                                                                                                                                                                                                       |
| History of CKD (stage $\geq$ 3)                                         |                                                                                                                                                                                                                                                                                       |
| History of type 1 diabetes                                              |                                                                                                                                                                                                                                                                                       |
| History of type 2 diabetes                                              |                                                                                                                                                                                                                                                                                       |
| Immunosuppressive disease                                               | Defined as the presence of a condition or procedure occurrence relating to any of the following: Hodgkin's lymphoma, non-Hodgkin's lymphoma, leukaemia, solid cancer, human immunodeficiency virus, autoimmune disease, solid organ transplant and/or allogeneic stem cell transplant |
| Immunosuppressive treatment                                             | Defined as $\geq$ 2 drug exposure events for systemic corticosteroid therapy in the past 365 days or $\geq$ 1 systemic non-corticosteroid immunosuppressants drug exposures in the past 365 days.                                                                                     |
| Cardiovascular disease (incl. congenital heart disease) or hypertension |                                                                                                                                                                                                                                                                                       |
| Chronic lung disease (COPD or asthma)                                   |                                                                                                                                                                                                                                                                                       |
| Sickle cell disease                                                     |                                                                                                                                                                                                                                                                                       |
| Neurodevelopmental disorder                                             |                                                                                                                                                                                                                                                                                       |
| Medical-related technological dependence                                | The presence of a procedure occurrence or device exposure event relating to any of the following: respiratory aspirator, gastro- or jejunostomy, Mitrofanoff, a nasogastric tube, renal replacement therapy, total parenteral nutrition or ventricular assistance                     |
| Liver disease                                                           |                                                                                                                                                                                                                                                                                       |
| Anti-diabetic therapies                                                 |                                                                                                                                                                                                                                                                                       |
| Acute or acute-on-chronic respiratory failure                           |                                                                                                                                                                                                                                                                                       |
| Pulmonary hypertension                                                  |                                                                                                                                                                                                                                                                                       |

|                                                      |  |
|------------------------------------------------------|--|
| Heart failure                                        |  |
| Acquired heart disease                               |  |
| Non-asthma and non-COPD chronic respiratory diseases |  |
| ICS-containing therapies                             |  |

*CKD* chronic kidney disease, *COPD* chronic obstructive pulmonary disease; *ICS* inhaled corticosteroid

<sup>a</sup>All applicable during baseline period or at index date, except for age  $\geq 65$  years (at index date only)

**Table S2. Study covariates**

| <b>Variable</b>                                          | <b>Type</b> | <b>Time frame</b>             | <b>Additional information</b>                                                                                                                                                                                                                                        |
|----------------------------------------------------------|-------------|-------------------------------|----------------------------------------------------------------------------------------------------------------------------------------------------------------------------------------------------------------------------------------------------------------------|
| <b>Age</b>                                               | Continuous  | Index date                    | Derived as year of index date – year of birth. Only year of birth is provided in data source                                                                                                                                                                         |
| <b>Gender</b>                                            | Categorical | Not applicable                | Recorded as 'FEMALE', 'MALE' or 'OTHER' in source data                                                                                                                                                                                                               |
| <b>Ethnicity</b>                                         | Categorical | Not applicable                | Assessed based on race and ethnicity concepts listed in Person table. (Note that White ethnicity is stratified into 'White Hispanic or Latino' and 'White not Hispanic or Latino'. This will be based on the ethnicity concept field and the race concept field)     |
| <b>US state of patient's primary care provider</b>       | Categorical | Not applicable                | Assessed based on the location of the patient's primary care provider as listed in the Person table                                                                                                                                                                  |
| <b>Antibody test during baseline</b>                     | Boolean     | Baseline period               | COVID-19 antibody tests will be identified based on the following CPT codes: 86328, 86769                                                                                                                                                                            |
| <b>Time from last vaccination dose</b>                   | Continuous  | Vaccination assessment period | Time from last vaccination dose to index date                                                                                                                                                                                                                        |
| <b>Patient fully vaccinated<sup>a</sup></b>              | Boolean     | Vaccination assessment period | <p>Patients has received two or more vaccinations during assessment period with an mRNA vaccine (Pfizer-BioNTech [BNT162b2] or Moderna [mRNA-1273])</p> <p>OR</p> <p>Patient has received a single dose of viral vector (Johnson &amp; Johnson ([JNJ-784336725])</p> |
| <b>Patient fully vaccinated with booster<sup>a</sup></b> | Boolean     | Vaccination assessment period | <p>Patient has received three or more vaccinations with an mRNA vaccine</p> <p>OR</p>                                                                                                                                                                                |

| Variable                                                                       | Type       | Time frame                    | Additional information                                                                                                                                               |
|--------------------------------------------------------------------------------|------------|-------------------------------|----------------------------------------------------------------------------------------------------------------------------------------------------------------------|
|                                                                                |            |                               | Two or more vaccinations, with at least one of those vaccinations being with JNJ-784336725                                                                           |
| <b>Patients partially vaccinated<sup>a</sup></b>                               | Boolean    | Vaccination assessment period | Patient has received one vaccine during assessment period with an mRNA vaccine (Pfizer-BioNTech [BNT162b2] or Moderna [mRNA-1273])                                   |
| <b>Patient unvaccinated</b>                                                    | Boolean    | Vaccination assessment period | Patient has received no SARS-CoV-2 vaccines during assessment period                                                                                                 |
| <b>Pre-COVID diagnoses</b>                                                     | Array      | Baseline period               | Conditions listed with a condition start date occurring during the baseline period. Will be based on Condition Concept Name listed in the Condition_Occurrence table |
| <b>Time to sotrovimab infusion from the COVID-19 diagnosis date (Cohort 1)</b> | Continuous | Baseline period               | Time from positive PCR/Ag test for SARS-CoV-2 or first date of diagnosis of U07.1 (COVID-19, virus identified) to sotrovimab infusion in Cohort 1                    |
| <b>Quan–Charlson Comorbidity Index</b>                                         | Integer    | Baseline period               | Based on the presence of ICD-9-CM and ICD-10-CM diagnosis codes incorporating 17 comorbidities                                                                       |
| <b>Number of healthcare encounters during baseline</b>                         | Integer    | Baseline period               | –                                                                                                                                                                    |
| <b>Number of inpatient encounters during baseline</b>                          | Integer    | Baseline period               | –                                                                                                                                                                    |
| <b>Number of encounters requiring critical care during baseline</b>            | Integer    | Baseline period               | Presence of a critical care, intubation or mechanical ventilation CPT code in the procedure occurrence table                                                         |

Ag antigen, COVID-19, coronavirus disease 2019, CPT, Current Procedural Terminology, PCR polymerase chain reaction, SARS-CoV-2, severe acute respiratory syndrome coronavirus 2

<sup>a</sup>Code set IDs for mRNA vaccines: 37003432, 37003518, 37003436, 724904 (vaccine unspecified); Code set IDs for viral vector vaccine: 739906, 702866, 724905
